# Supplementary material for: Motor cortex functional connectivity is associated with underlying neurochemistry in ALS
Source: PubMed Central journal article supplement — J Neurol Neurosurg Psychiatry. 2022 Nov 15;94(3):193–200. doi: 10.1136/jnnp-2022-329993 (PMC9985743; doi:10.1136/jnnp-2022-329993), 2022-11-15
Supplement: jnnp-2022-329993supp001.pdf [file jnnp-2022-329993supp001.pdf]

| Site      | ALS | HC |
|-----------|-----|----|
| Calgary   | 6   | 9  |
| Edmonton  | 15  | 20 |
| Montreal  | 10  | 7  |
| Toronto   | 15  | 10 |
| Vancouver | 6   | 6  |
|           |     |    |
| Total     | 52  | 52 |

Breakdown of participant numbers by site
